# Supplementary material
Source: publisher figshare collection journal article supplement (https://acs.figshare.com/ndownloader/files/8213843)
Supplement: Supplementary file 1 [file 8213843]

Compound	Smiles	Pharmacology at the k–opioid receptors: Inhibition of forskolin-induced cAMP accumulation
		EC50 ± SEM a, b (nM)
14	O=C1[C@@]2([H])[C@](CC[C@]3([H])[C@]2(C)C[C@@H](C4=COC=C4)OC3=O)(C)[C@H](C(OC)=O)C[C@@]15OC(CC5)=O	0.6 ± 0.2
15	O=C1[C@@]2([H])[C@](CC[C@]3([H])[C@]2(C)C[C@@H](C4=COC=C4)OC3=O)(C)[C@H](C(OC)=O)CC1=O	ND
16	O=C1[C@@]2([H])[C@](CC[C@]3([H])[C@]2(C)C[C@@H](C4=COC=C4)OC3=O)(C)[C@H](C(OC)=O)C[C@@]15O[RuIILn]C(C(OC)=O)C5	ND
17	O=C1[C@@]2([H])[C@](CC[C@]3([H])[C@]2(C)C[C@@H](C4=COC=C4)OC3=O)(C)[C@H](C(OC)=O)C[C@@]1(CCC(OC)=O)O	ND
18	O=C1[C@@]2([H])[C@](CC[C@]3([H])[C@]2(C)C[C@@H](C4=COC=C4)OC3=O)(C)[C@H](C(OC)=O)C[C@@]1(CCC(OC)=O)OC(C5=CC=CC=C5)=O	ND
19	O=C1[C@@]2([H])[C@](CC[C@]3([H])[C@]2(C)C[C@@H](C4=COC=C4)OC3=O)(C)[C@H](C(OC)=O)C=C1CCC(OC)=O	ND
20	O=C(OC)[C@@]1([H])[C@](CC[C@]2([H])[C@]1(C)C[C@@H](C3=COC=C3)OC2=O)(C)[C@H](C(OC)=O)CC=O	30 ± 10
21	O=C(OC)[C@@]1([H])[C@](CC[C@]2([H])[C@]1(C)C[C@@H](C3=COC=C3)OC2=O)(C)[C@H](C(OC)=O)CC(O)=O	>10000
23	O=C(OC)[C@@]1([H])[C@](CC[C@]2([H])[C@]1(C)C[C@@H](C3=COC=C3)OC2=O)(C)[C@H](C(OC)=O)CCO	>10000
24	O=C(OC)[C@@]1([H])[C@](CC[C@]2([H])[C@]1(C)C[C@@H](C3=COC=C3)OC2=O)(C)[C@H](C(OC)=O)CCOC(C)=O	13 ± 3
25	O=C(OC)[C@@]1([H])[C@](CC[C@]2([H])[C@]1(C)C[C@@H](C3=COC=C3)OC2=O)(C)[C@H](C(OC)=O)CC(OC)OC	11.7 ± 0.4
		a Mean ± standard error of the mean; n ³ 2 individual experiments run in triplicate. b KOR Emax = 100%.
